# Supplementary material for: Combined targeting of STAT3 and STAT5: a novel approach to overcome drug resistance in chronic myeloid leukemia
Source: PubMed Central journal article supplement — Haematologica. 2017 Sep;102(9):1519–29. doi: 10.3324/haematol.2016.163436 (PMC5685220; doi:10.3324/haematol.2016.163436), 2017-09

# Combined targeting of STAT3, STAT5, and heme-oxygenase-1 overcomes resistance in BCR-ABL1<sup>+</sup> cells

CDDO-Me inhibits proliferation and viability in TKI-sensitive and TKI-resistant BCR-ABL1<sup>+</sup> cell lines and primary leukemic cells

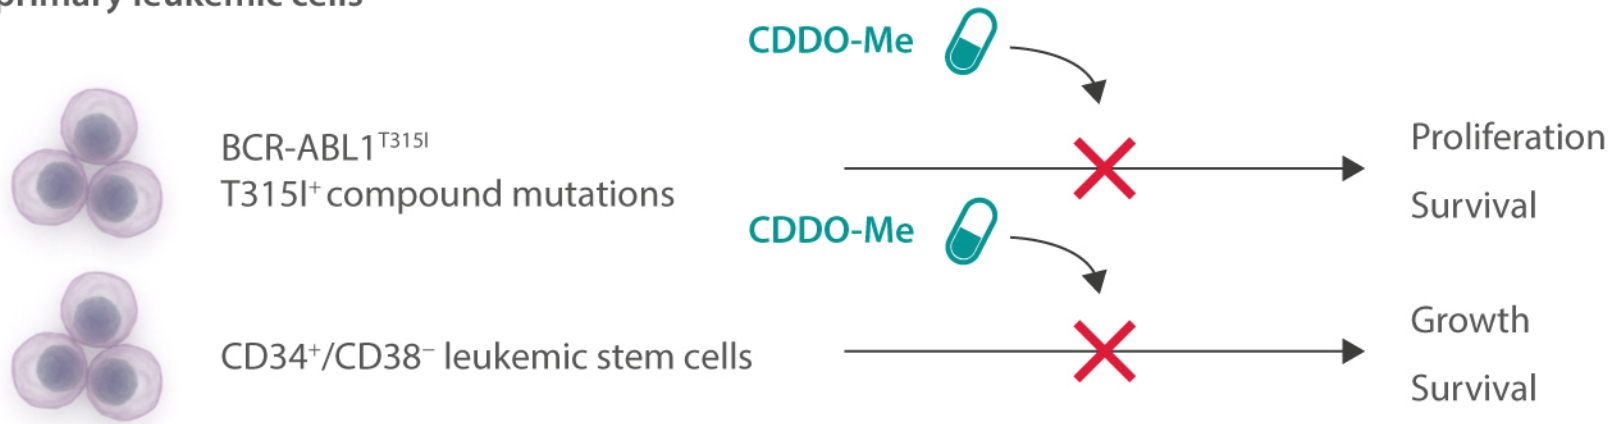

CDDO-Me synergizes with BCR-ABL1-targeting TKI

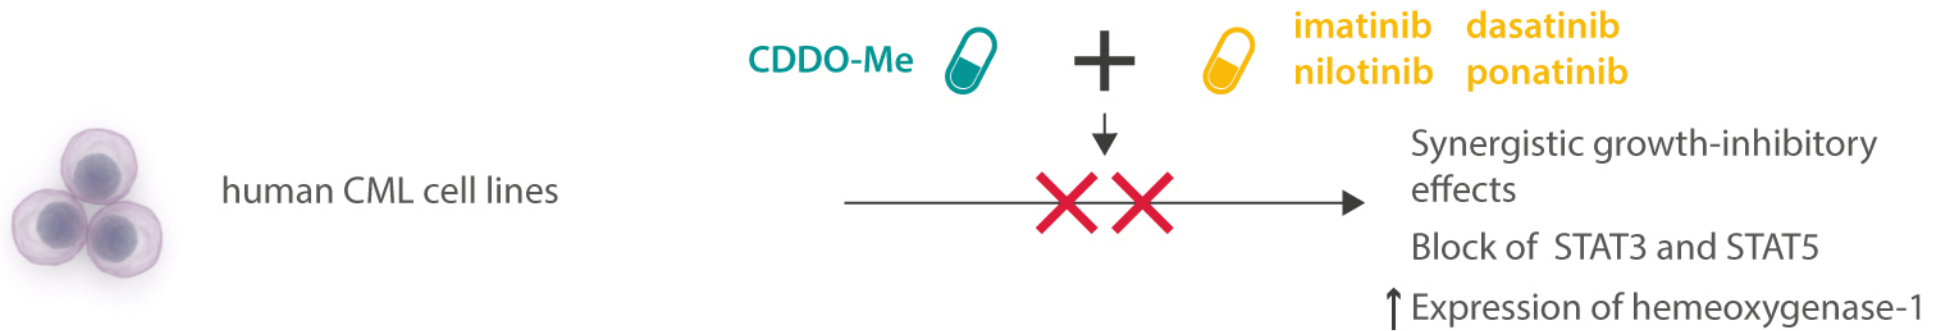

The Hemeoxygenase-1 inhibitor SMA-ZnPP sensitizes CML cells against CDDO-Me and TKI

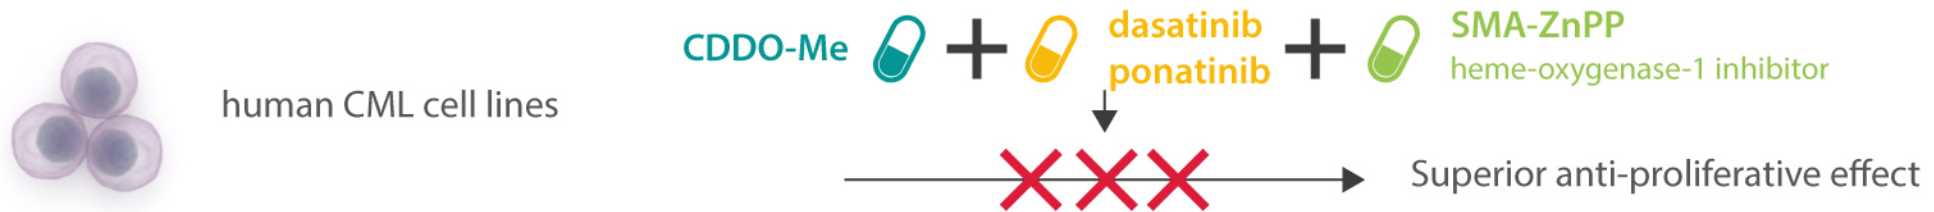

Supplement: HAEMATOL-2016-163436.Gleixner.pdf [file HAEMATOL-2016-163436.Gleixner.pdf]
